# Supplementary material for: Fibroblastic Transformation of Corneal Keratocytes by Rac Inhibition is Modulated by Extracellular Matrix Structure and Stiffness
Source: J Funct Biomater. 2015 Apr 14;6(2):222–40. doi: 10.3390/jfb6020222 (PMC4493509; doi:10.3390/jfb6020222)
Supplement: Supplementary File 1 [file jfb-06-00222-s001.pdf]

## Supplementary Materials

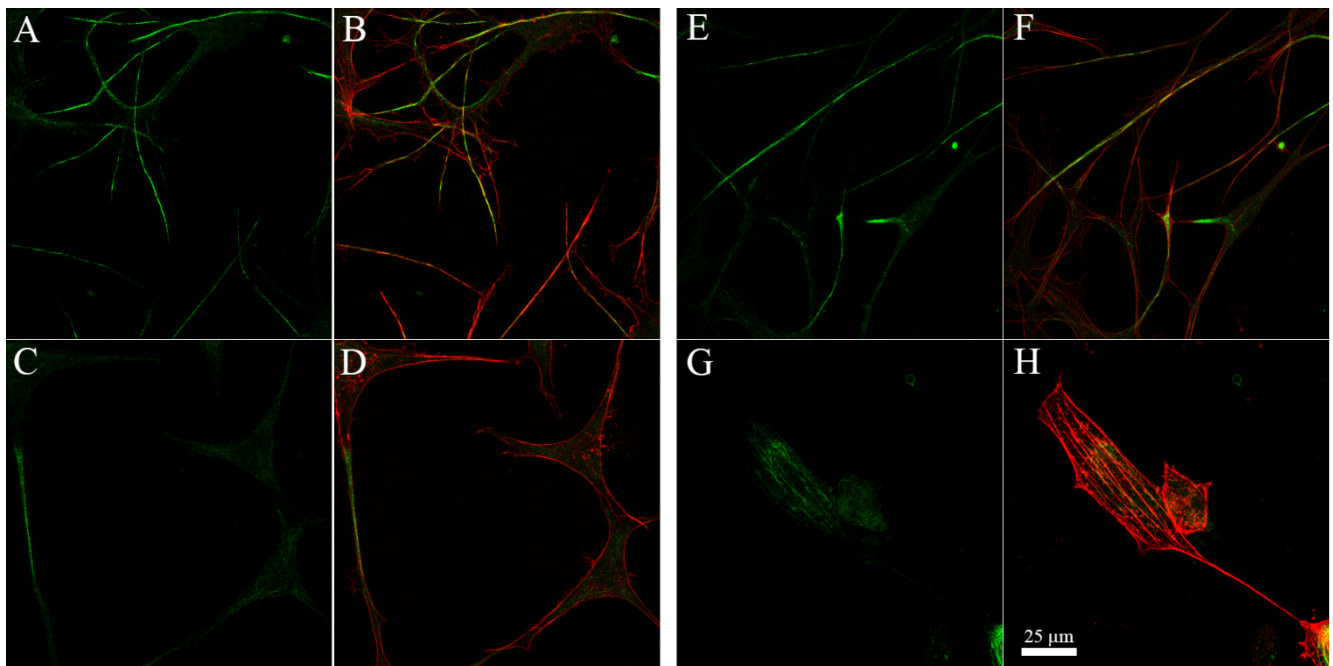

**Figure S1.** Rac GTP Immunolabeling of corneal keratocytes on the bottom of 3-D collagen matrices. Green = Rac GTP, Red = F-actin. (A,C,E,G) show Rac GTP labeling. (B,D,F,H) show overlays of Rac GTP and F-actin labeling. (A,B) Cells cultured for 24 h in basal serum free media. Dendritic processes showed the strongest labeling with the RacGTP antibody; (C,D) Cells cultured in basal media plus NSC23766. Incubation with NSC23766 for 24 h resulted in a reduction in the intensity of RacGTP labeling of dendritic processes in some cells; (E,F) Cells cultured in PDGF for 24 h. Strong RacGTP labeling of the dendritic cell processes was observed, with much weaker labeling of the cell body; (G,H) Incubation with NSC23766 and PDGF resulted in the development of stress fibers, and RacGTP labeling was observed in the cell body, but barely detectable in the cell processes.
